# Supplementary material
Source: PubMed Central journal article supplement (PMC123624)

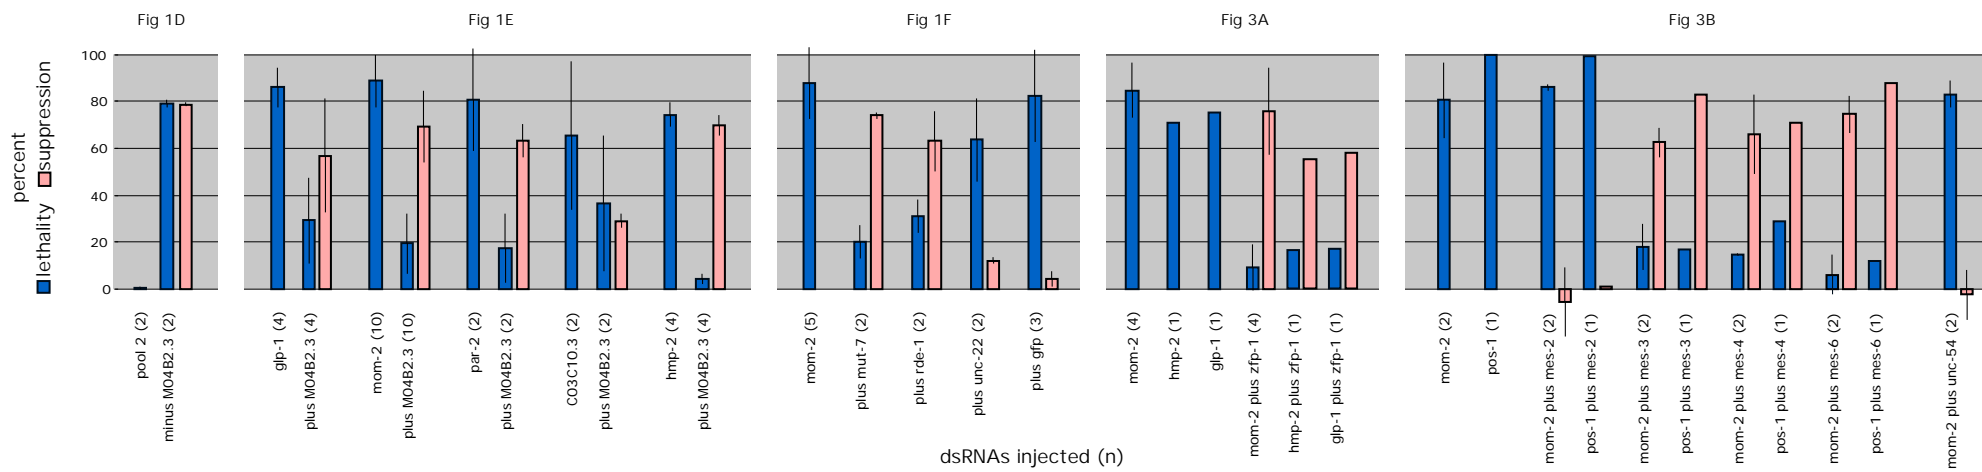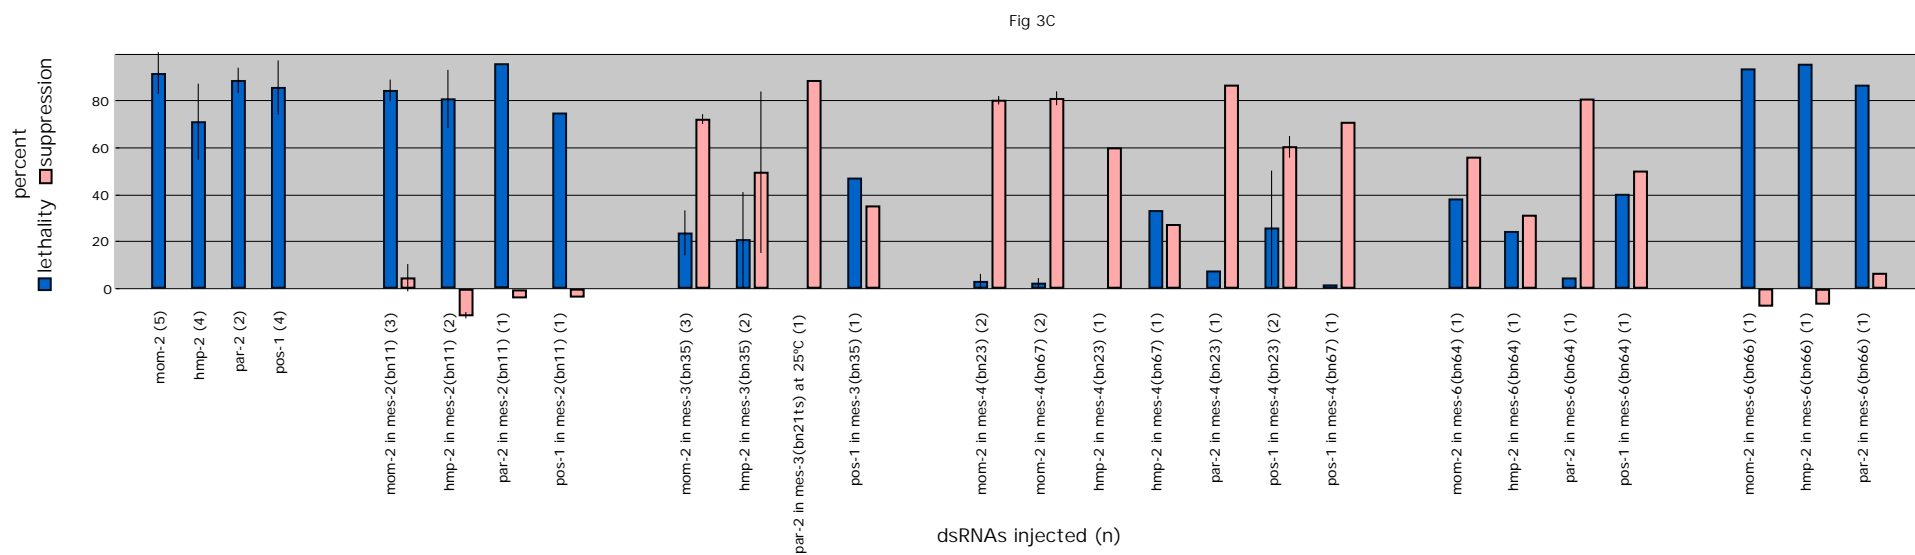

Supplement: pnas_062605199_2.pdf [file pnas_062605199_2.pdf]
